# Supplementary material for: Guideline-conform translation and cultural adaptation of the Addenbrooke’s Cognitive Examination III into German
Source: Ger Med Sci. 2020 Apr 6;18:Doc04. doi: 10.3205/000280 (PMC7174851; doi:10.3205/000280)
Supplement: ACE-III A (German) [file GMS-18-04-s-003.pdf]

# ADDENBROOKE'S COGNITIVE EXAMINATION – ACE-III

## Deutsche Version A (2012\*)

|                                                                     |                                                                                                                                                                 |
|---------------------------------------------------------------------|-----------------------------------------------------------------------------------------------------------------------------------------------------------------|
| Name: _____<br>Geburtsdatum: _____<br>Prob.-Nr. oder Adresse: _____ | Erhebungsdatum: ____/____/____<br>Name des Untersuchenden: _____<br>Höchster erreichter Bildungsgrad: _____<br>Beruf: _____<br>Händigkeit (links/rechts): _____ |
|---------------------------------------------------------------------|-----------------------------------------------------------------------------------------------------------------------------------------------------------------|

### AUFMERKSAMKEIT

|                                                    |                  |                        |       |            |            |                                                                                    |
|----------------------------------------------------|------------------|------------------------|-------|------------|------------|------------------------------------------------------------------------------------|
| ➤ Fragen Sie: „Welche/n/s ... haben wir heute?“    | Wochentag        | Datum                  | Monat | Jahr       | Jahreszeit | <b>Aufmerksamkeit</b><br>[Punkte 0-5]<br><input style="width: 40px;" type="text"/> |
| ➤ Fragen Sie: „In welcher/m ... befinden wir uns?“ | Zimmer/<br>Etage | Straße/<br>Krankenhaus | Stadt | Bundesland | Land       | <b>Aufmerksamkeit</b><br>[Punkte 0-5]<br><input style="width: 40px;" type="text"/> |

### AUFMERKSAMKEIT

|                                                                                                                                                                                                                                                                                                                                                                                                                 |                                                                                    |
|-----------------------------------------------------------------------------------------------------------------------------------------------------------------------------------------------------------------------------------------------------------------------------------------------------------------------------------------------------------------------------------------------------------------|------------------------------------------------------------------------------------|
| ➤ Sagen Sie: „Ich werde Ihnen drei Wörter sagen und bitte Sie, diese danach zu wiederholen: „Zitrone, Schlüssel, Ball“. Nach erfolgter Wiederholung sagen Sie: „Versuchen Sie, sich diese Wörter zu merken, denn ich werde Sie später noch einmal danach fragen.“<br>➤ Nur der erste Versuch wird bewertet.<br>➤ Wiederholen Sie bis zu drei Mal, wenn notwendig und notieren Sie die Anzahl der Versuche: ____ | <b>Aufmerksamkeit</b><br>[Punkte 0-3]<br><input style="width: 40px;" type="text"/> |
|-----------------------------------------------------------------------------------------------------------------------------------------------------------------------------------------------------------------------------------------------------------------------------------------------------------------------------------------------------------------------------------------------------------------|------------------------------------------------------------------------------------|

### AUFMERKSAMKEIT

|                                                                                                                                                                                                                                                                                                                             |                                                                                    |
|-----------------------------------------------------------------------------------------------------------------------------------------------------------------------------------------------------------------------------------------------------------------------------------------------------------------------------|------------------------------------------------------------------------------------|
| ➤ Bitten Sie: „Ziehen Sie von der Zahl 100 jeweils 7 ab, bis ich Sie bitte aufzuhören.“<br>➤ Unterbrechen Sie den Probanden bei einem Fehler nicht. Lassen Sie ihn fortfahren und überprüfen die folgenden Antworten (z.B. 93, 84, 77, 70, 63 – 4 Punkte).<br>➤ Stoppen Sie nach 5 Subtraktionen (93, 86, 79, 72, 65): ____ | <b>Aufmerksamkeit</b><br>[Punkte 0-5]<br><input style="width: 40px;" type="text"/> |
|-----------------------------------------------------------------------------------------------------------------------------------------------------------------------------------------------------------------------------------------------------------------------------------------------------------------------------|------------------------------------------------------------------------------------|

### GEDÄCHTNIS

|                                                                                                           |                                                                                |
|-----------------------------------------------------------------------------------------------------------|--------------------------------------------------------------------------------|
| ➤ Fragen Sie: „Welche drei Wörter hatte ich Sie gebeten zu wiederholen und sich dann zu merken?“<br>_____ | <b>Gedächtnis</b><br>[Punkte 0-3]<br><input style="width: 40px;" type="text"/> |
|-----------------------------------------------------------------------------------------------------------|--------------------------------------------------------------------------------|

### WORTFLÜSSIGKEIT

|                                                                                                                                                                                                                                                                                                                                                                                                                                                                                         |                                                                                                                                                                                                                                                                                                                                                                                                |      |   |       |   |       |   |       |   |      |   |     |   |     |   |     |   |        |         |
|-----------------------------------------------------------------------------------------------------------------------------------------------------------------------------------------------------------------------------------------------------------------------------------------------------------------------------------------------------------------------------------------------------------------------------------------------------------------------------------------|------------------------------------------------------------------------------------------------------------------------------------------------------------------------------------------------------------------------------------------------------------------------------------------------------------------------------------------------------------------------------------------------|------|---|-------|---|-------|---|-------|---|------|---|-----|---|-----|---|-----|---|--------|---------|
| ➤ <b>Buchstaben</b><br>Sagen Sie: „Ich nenne Ihnen einen Buchstaben und möchte, dass Sie mir so viele Wörter wie möglich sagen, die mit diesem Buchstaben beginnen. Es dürfen aber weder Personen-, noch Ortsnamen sein. Nenne ich Ihnen beispielsweise den Buchstaben „K“, wären „Katze, kaufen, kurz“, usw. mögliche Antworten, nicht jedoch „Katharina“ oder „Kiel“. Haben Sie das verstanden? Sind Sie bereit? Sie haben eine Minute Zeit. Bitte verwenden Sie den Buchstaben „P“.“ | <b>Wortflüssigkeit</b><br>[Punkte 0 – 7]<br><input style="width: 40px;" type="text"/>                                                                                                                                                                                                                                                                                                          |      |   |       |   |       |   |       |   |      |   |     |   |     |   |     |   |        |         |
|                                                                                                                                                                                                                                                                                                                                                                                                                                                                                         | <table border="1" style="width: 100%; border-collapse: collapse;"> <tr><td>≥ 18</td><td>7</td></tr> <tr><td>14-17</td><td>6</td></tr> <tr><td>11-13</td><td>5</td></tr> <tr><td>8-10</td><td>4</td></tr> <tr><td>6-7</td><td>3</td></tr> <tr><td>4-5</td><td>2</td></tr> <tr><td>2-3</td><td>1</td></tr> <tr><td>0-1</td><td>0</td></tr> <tr><td>Gesamt</td><td>korrekt</td></tr> </table>     | ≥ 18 | 7 | 14-17 | 6 | 11-13 | 5 | 8-10  | 4 | 6-7  | 3 | 4-5 | 2 | 2-3 | 1 | 0-1 | 0 | Gesamt | korrekt |
| ≥ 18                                                                                                                                                                                                                                                                                                                                                                                                                                                                                    | 7                                                                                                                                                                                                                                                                                                                                                                                              |      |   |       |   |       |   |       |   |      |   |     |   |     |   |     |   |        |         |
| 14-17                                                                                                                                                                                                                                                                                                                                                                                                                                                                                   | 6                                                                                                                                                                                                                                                                                                                                                                                              |      |   |       |   |       |   |       |   |      |   |     |   |     |   |     |   |        |         |
| 11-13                                                                                                                                                                                                                                                                                                                                                                                                                                                                                   | 5                                                                                                                                                                                                                                                                                                                                                                                              |      |   |       |   |       |   |       |   |      |   |     |   |     |   |     |   |        |         |
| 8-10                                                                                                                                                                                                                                                                                                                                                                                                                                                                                    | 4                                                                                                                                                                                                                                                                                                                                                                                              |      |   |       |   |       |   |       |   |      |   |     |   |     |   |     |   |        |         |
| 6-7                                                                                                                                                                                                                                                                                                                                                                                                                                                                                     | 3                                                                                                                                                                                                                                                                                                                                                                                              |      |   |       |   |       |   |       |   |      |   |     |   |     |   |     |   |        |         |
| 4-5                                                                                                                                                                                                                                                                                                                                                                                                                                                                                     | 2                                                                                                                                                                                                                                                                                                                                                                                              |      |   |       |   |       |   |       |   |      |   |     |   |     |   |     |   |        |         |
| 2-3                                                                                                                                                                                                                                                                                                                                                                                                                                                                                     | 1                                                                                                                                                                                                                                                                                                                                                                                              |      |   |       |   |       |   |       |   |      |   |     |   |     |   |     |   |        |         |
| 0-1                                                                                                                                                                                                                                                                                                                                                                                                                                                                                     | 0                                                                                                                                                                                                                                                                                                                                                                                              |      |   |       |   |       |   |       |   |      |   |     |   |     |   |     |   |        |         |
| Gesamt                                                                                                                                                                                                                                                                                                                                                                                                                                                                                  | korrekt                                                                                                                                                                                                                                                                                                                                                                                        |      |   |       |   |       |   |       |   |      |   |     |   |     |   |     |   |        |         |
| ➤ <b>Tiere</b><br>Sagen Sie: „Jetzt nennen Sie bitte so viele Tiere wie möglich. Alle Anfangsbuchstaben sind gestattet.“                                                                                                                                                                                                                                                                                                                                                                | <b>Wortflüssigkeit</b><br>[Punkte 0 – 7]<br><input style="width: 40px;" type="text"/>                                                                                                                                                                                                                                                                                                          |      |   |       |   |       |   |       |   |      |   |     |   |     |   |     |   |        |         |
|                                                                                                                                                                                                                                                                                                                                                                                                                                                                                         | <table border="1" style="width: 100%; border-collapse: collapse;"> <tr><td>≥ 22</td><td>7</td></tr> <tr><td>17-21</td><td>6</td></tr> <tr><td>14-16</td><td>5</td></tr> <tr><td>11-13</td><td>4</td></tr> <tr><td>9-10</td><td>3</td></tr> <tr><td>7-8</td><td>2</td></tr> <tr><td>5-6</td><td>1</td></tr> <tr><td>&lt;5</td><td>0</td></tr> <tr><td>Gesamt</td><td>Korrekt</td></tr> </table> | ≥ 22 | 7 | 17-21 | 6 | 14-16 | 5 | 11-13 | 4 | 9-10 | 3 | 7-8 | 2 | 5-6 | 1 | <5  | 0 | Gesamt | Korrekt |
| ≥ 22                                                                                                                                                                                                                                                                                                                                                                                                                                                                                    | 7                                                                                                                                                                                                                                                                                                                                                                                              |      |   |       |   |       |   |       |   |      |   |     |   |     |   |     |   |        |         |
| 17-21                                                                                                                                                                                                                                                                                                                                                                                                                                                                                   | 6                                                                                                                                                                                                                                                                                                                                                                                              |      |   |       |   |       |   |       |   |      |   |     |   |     |   |     |   |        |         |
| 14-16                                                                                                                                                                                                                                                                                                                                                                                                                                                                                   | 5                                                                                                                                                                                                                                                                                                                                                                                              |      |   |       |   |       |   |       |   |      |   |     |   |     |   |     |   |        |         |
| 11-13                                                                                                                                                                                                                                                                                                                                                                                                                                                                                   | 4                                                                                                                                                                                                                                                                                                                                                                                              |      |   |       |   |       |   |       |   |      |   |     |   |     |   |     |   |        |         |
| 9-10                                                                                                                                                                                                                                                                                                                                                                                                                                                                                    | 3                                                                                                                                                                                                                                                                                                                                                                                              |      |   |       |   |       |   |       |   |      |   |     |   |     |   |     |   |        |         |
| 7-8                                                                                                                                                                                                                                                                                                                                                                                                                                                                                     | 2                                                                                                                                                                                                                                                                                                                                                                                              |      |   |       |   |       |   |       |   |      |   |     |   |     |   |     |   |        |         |
| 5-6                                                                                                                                                                                                                                                                                                                                                                                                                                                                                     | 1                                                                                                                                                                                                                                                                                                                                                                                              |      |   |       |   |       |   |       |   |      |   |     |   |     |   |     |   |        |         |
| <5                                                                                                                                                                                                                                                                                                                                                                                                                                                                                      | 0                                                                                                                                                                                                                                                                                                                                                                                              |      |   |       |   |       |   |       |   |      |   |     |   |     |   |     |   |        |         |
| Gesamt                                                                                                                                                                                                                                                                                                                                                                                                                                                                                  | Korrekt                                                                                                                                                                                                                                                                                                                                                                                        |      |   |       |   |       |   |       |   |      |   |     |   |     |   |     |   |        |         |

| <b>GEDÄCHTNIS</b>                                                                                                                                                                                                                                                                                                                                                                                                                                                                                                                                                                                                                                                                                                                                       |                                  |                                  |                                                                                                                                   |
|---------------------------------------------------------------------------------------------------------------------------------------------------------------------------------------------------------------------------------------------------------------------------------------------------------------------------------------------------------------------------------------------------------------------------------------------------------------------------------------------------------------------------------------------------------------------------------------------------------------------------------------------------------------------------------------------------------------------------------------------------------|----------------------------------|----------------------------------|-----------------------------------------------------------------------------------------------------------------------------------|
| <ul style="list-style-type: none"> <li>➤ Sagen Sie: „Ich werde Ihnen einen Namen und eine Adresse sagen und möchte, dass Sie den Namen und die Adresse wiederholen. Damit Sie sich den Namen und die Adresse besser merken können, wiederholen wir sie drei Mal. Ich frage später noch einmal nach dem Namen und der Adresse.“</li> <li>➤ Nur der dritte Versuch wird gewertet.</li> </ul>                                                                                                                                                                                                                                                                                                                                                              |                                  |                                  | <b>Gedächtnis</b><br>[Punkte 0 – 7]<br><div style="border: 1px solid black; width: 40px; height: 20px; margin: 5px auto;"></div>  |
|                                                                                                                                                                                                                                                                                                                                                                                                                                                                                                                                                                                                                                                                                                                                                         | <b>Erster Versuch</b>            | <b>Zweiter Versuch</b>           | <b>Dritter Versuch</b>                                                                                                            |
| Peter Müller<br>Dorf Strasse 73<br>Wolfsburg<br>Niedersachsen                                                                                                                                                                                                                                                                                                                                                                                                                                                                                                                                                                                                                                                                                           | _____<br>_____<br>_____<br>_____ | _____<br>_____<br>_____<br>_____ | _____<br>_____<br>_____<br>_____                                                                                                  |
| <b>GEDÄCHTNIS</b>                                                                                                                                                                                                                                                                                                                                                                                                                                                                                                                                                                                                                                                                                                                                       |                                  |                                  |                                                                                                                                   |
| <ul style="list-style-type: none"> <li>➤ Name des/der amtierenden Bundeskanzlers/in.....</li> <li>➤ Name des/der amtierenden Bundespräsidenten/in.....</li> <li>➤ Name des/der amtierenden Präsidenten/in der USA.....</li> <li>➤ Name des US-amerikanischen Präsidenten, der in den 1960ern ermordet wurde.....</li> </ul>                                                                                                                                                                                                                                                                                                                                                                                                                             |                                  |                                  | <b>Gedächtnis</b><br>[Punkte 0 – 4 ]<br><div style="border: 1px solid black; width: 40px; height: 20px; margin: 5px auto;"></div> |
| <b>SPRACHE</b>                                                                                                                                                                                                                                                                                                                                                                                                                                                                                                                                                                                                                                                                                                                                          |                                  |                                  |                                                                                                                                   |
| <ul style="list-style-type: none"> <li>➤ Legen Sie einen Stift und ein Blatt Papier vor den Probanden. Zur Probe, bitten Sie ihn: „Heben Sie den Stift auf und dann das Blatt Papier.“ Falls dies nicht gelingt, geben Sie 0 Punkte und beenden Sie diesen Abschnitt.</li> <li>➤ Wurde der Probeversuch korrekt durchgeführt, machen Sie mit den folgenden drei Aufgaben weiter:             <ul style="list-style-type: none"> <li>○ “Legen Sie das Blatt Papier auf den Stift”</li> <li>○ “Heben Sie den Stift auf, aber nicht das Blatt Papier”</li> <li>○ “Reichen Sie mir den Stift, nachdem Sie das Blatt Papier berührt haben”</li> </ul> </li> <li>➤ Wichtig: Legen Sie Stift und Papier vor jeder Aufgabe erneut vor den Probanden.</li> </ul> |                                  |                                  | <b>Sprache</b><br>[Punkte 0-3]<br><div style="border: 1px solid black; width: 40px; height: 20px; margin: 5px auto;"></div>       |
| <b>SPRACHE</b>                                                                                                                                                                                                                                                                                                                                                                                                                                                                                                                                                                                                                                                                                                                                          |                                  |                                  |                                                                                                                                   |
| <ul style="list-style-type: none"> <li>➤ Sagen Sie: „Bitte schreiben Sie zwei Sätze. Der Inhalt der Sätze ist Ihnen überlassen. Ich möchte Sie allerdings bitten, in ganzen Sätzen zu schreiben und Abkürzungen zu vermeiden.“ Wenn dem Probanden kein Thema einfällt, können Sie Themen vorschlagen: „Sie könnten beispielsweise über Ihren letzten Urlaub, Ihre Hobbies, Ihre Familie oder Kindheit schreiben.“ Sollte der Proband nur einen Satz aufschreiben, bitten Sie um einen zweiten Satz.</li> <li>➤ Jeder Satz muss sowohl Subjekt als auch Verb enthalten. Grammatik und Rechtschreibung werden bewertet. Die Sätze müssen nicht vom gleichen Thema handeln. Siehe Bewertungsanleitung für weitere Informationen.</li> </ul>                |                                  |                                  | <b>Sprache</b><br>[Punkte 0-2]<br><div style="border: 1px solid black; width: 40px; height: 20px; margin: 5px auto;"></div>       |
|                                                                                                                                                                                                                                                                                                                                                                                                                                                                                                                                                                                                                                                                                                                                                         |                                  |                                  |                                                                                                                                   |
| <b>SPRACHE</b>                                                                                                                                                                                                                                                                                                                                                                                                                                                                                                                                                                                                                                                                                                                                          |                                  |                                  |                                                                                                                                   |
| <ul style="list-style-type: none"> <li>➤ Bitten Sie den Probanden folgende Wörter zu wiederholen: „Butterblume“, „Ekzentriker“, „unentzifferbar“, „Statistiker“</li> <li>➤ Vergeben Sie 2 Punkte wenn alle Wörter korrekt wiederholt wurden; 1 Punkt, wenn 3 der Wörter korrekt wiederholt wurden; 0 Punkte bei 2 oder weniger korrekten Wiederholungen.</li> </ul>                                                                                                                                                                                                                                                                                                                                                                                     |                                  |                                  | <b>Sprache</b><br>[Punkte 0-2]<br><div style="border: 1px solid black; width: 40px; height: 20px; margin: 5px auto;"></div>       |

|                                                                                                                                                                                                                                                                                                                                                                                                                                                                                                                                                                                                                                                                                                                                                                                                                                                                                                                                                                                                                                                                                                                                                                                                                                                                                                                                                                                                                                                                                                                                                                                                                                                                                                                                                                                                                                                                                                                                                                                                                                                                                                                                                     |                                                         |
|-----------------------------------------------------------------------------------------------------------------------------------------------------------------------------------------------------------------------------------------------------------------------------------------------------------------------------------------------------------------------------------------------------------------------------------------------------------------------------------------------------------------------------------------------------------------------------------------------------------------------------------------------------------------------------------------------------------------------------------------------------------------------------------------------------------------------------------------------------------------------------------------------------------------------------------------------------------------------------------------------------------------------------------------------------------------------------------------------------------------------------------------------------------------------------------------------------------------------------------------------------------------------------------------------------------------------------------------------------------------------------------------------------------------------------------------------------------------------------------------------------------------------------------------------------------------------------------------------------------------------------------------------------------------------------------------------------------------------------------------------------------------------------------------------------------------------------------------------------------------------------------------------------------------------------------------------------------------------------------------------------------------------------------------------------------------------------------------------------------------------------------------------------|---------------------------------------------------------|
| <b>SPRACHE</b>                                                                                                                                                                                                                                                                                                                                                                                                                                                                                                                                                                                                                                                                                                                                                                                                                                                                                                                                                                                                                                                                                                                                                                                                                                                                                                                                                                                                                                                                                                                                                                                                                                                                                                                                                                                                                                                                                                                                                                                                                                                                                                                                      |                                                         |
| ➤ Bitten Sie den Probanden folgendes zu wiederholen: „ <b>Es ist nicht alles Gold, was glänzt.</b> “                                                                                                                                                                                                                                                                                                                                                                                                                                                                                                                                                                                                                                                                                                                                                                                                                                                                                                                                                                                                                                                                                                                                                                                                                                                                                                                                                                                                                                                                                                                                                                                                                                                                                                                                                                                                                                                                                                                                                                                                                                                | <b>Sprache</b><br>[Punkte 0-1]<br><input type="text"/>  |
| ➤ Bitten Sie den Probanden folgendes zu wiederholen: „ <b>Der frühe Vogel fängt den Wurm.</b> “                                                                                                                                                                                                                                                                                                                                                                                                                                                                                                                                                                                                                                                                                                                                                                                                                                                                                                                                                                                                                                                                                                                                                                                                                                                                                                                                                                                                                                                                                                                                                                                                                                                                                                                                                                                                                                                                                                                                                                                                                                                     | <b>Sprache</b><br>[Punkte 0-1]<br><input type="text"/>  |
| <b>SPRACHE</b>                                                                                                                                                                                                                                                                                                                                                                                                                                                                                                                                                                                                                                                                                                                                                                                                                                                                                                                                                                                                                                                                                                                                                                                                                                                                                                                                                                                                                                                                                                                                                                                                                                                                                                                                                                                                                                                                                                                                                                                                                                                                                                                                      |                                                         |
| ➤ Bitten Sie den Probanden, folgende Bilder zu benennen:<br><br><div style="display: flex; flex-wrap: wrap;"> <div style="width: 33%; text-align: center;"> <input type="text"/><br/> 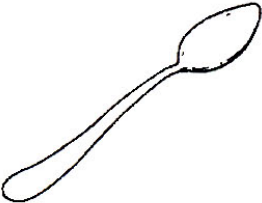 </div> <div style="width: 33%; text-align: center;"> <input type="text"/><br/> 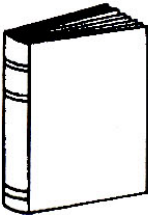 </div> <div style="width: 33%; text-align: center;"> <input type="text"/><br/> 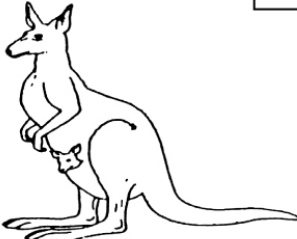 </div> <div style="width: 33%; text-align: center;"> <input type="text"/><br/> 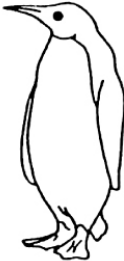 </div> <div style="width: 33%; text-align: center;"> <input type="text"/><br/> 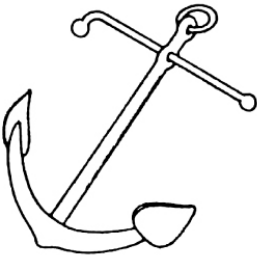 </div> <div style="width: 33%; text-align: center;"> <input type="text"/><br/> 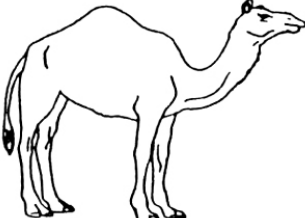 </div> <div style="width: 33%; text-align: center;"> <input type="text"/><br/> 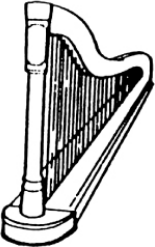 </div> <div style="width: 33%; text-align: center;"> <input type="text"/><br/> 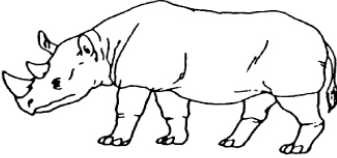 </div> <div style="width: 33%; text-align: center;"> <input type="text"/><br/> 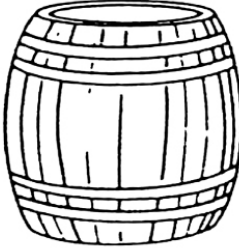 </div> <div style="width: 33%; text-align: center;"> <input type="text"/><br/> 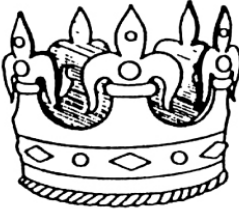 </div> <div style="width: 33%; text-align: center;"> <input type="text"/><br/> 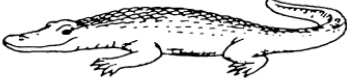 </div> <div style="width: 33%; text-align: center;"> <input type="text"/><br/> 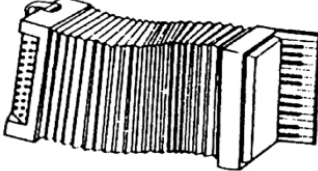 </div> </div> | <b>Sprache</b><br>[Punkte 0-12]<br><input type="text"/> |
| <b>SPRACHE</b>                                                                                                                                                                                                                                                                                                                                                                                                                                                                                                                                                                                                                                                                                                                                                                                                                                                                                                                                                                                                                                                                                                                                                                                                                                                                                                                                                                                                                                                                                                                                                                                                                                                                                                                                                                                                                                                                                                                                                                                                                                                                                                                                      |                                                         |
| ➤ Mit Hilfe der oben gezeigten Bilder, bitten Sie den Probanden:<br><ul style="list-style-type: none"> <li>• Auf das Bild zu zeigen, das mit Monarchie in Verbindung gebracht werden kann .....</li> <li>• Auf das Bild zu zeigen, das ein Beuteltier darstellt .....</li> <li>• Auf das Bild zu zeigen, welches in der Antarktis gefunden werden kann .....</li> <li>• Auf das Bild zu zeigen, das einen Bezug zur Seefahrt hat .....</li> </ul>                                                                                                                                                                                                                                                                                                                                                                                                                                                                                                                                                                                                                                                                                                                                                                                                                                                                                                                                                                                                                                                                                                                                                                                                                                                                                                                                                                                                                                                                                                                                                                                                                                                                                                   | <b>Sprache</b><br>[Punkte 0-4]<br><input type="text"/>  |

**SPRACHE**

- Bitte Sie den Probanden die folgenden Wörter zu lesen: (1 Punkt gibt es sofern alle Wörter korrekt sind)

**Uhr  
Maß  
fort  
platt  
Schrank**

**Sprache**  
[Punkte 0-1]

**VISUELL-RÄUMLICHE FÄHIGKEITEN**

- Unendlichkeits-Symbol: Bitte Sie den Probanden, folgendes Symbol nachzuzeichnen.

**Visuell-räumlich**  
[Punkte 0-1]

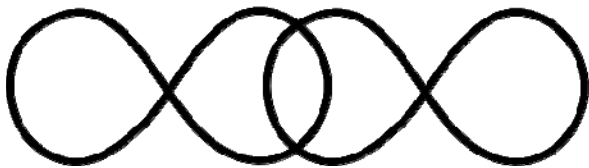

- Strichwürfel: Bitte Sie den Probanden, folgende Darstellung nachzuzeichnen (für die Punktevergabe, siehe Bewertungsanleitung).

**Visuell-räumlich**  
[Punkte 0-2]

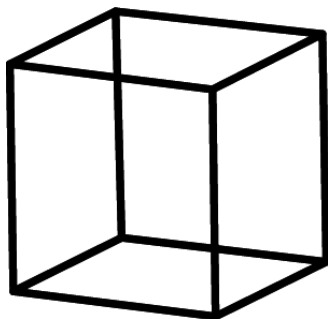

- Uhr: Bitte Sie den Probanden, das Ziffernblatt einer Uhr zu zeichnen, deren Zeiger auf Zehn nach Fünf stehen (für Punktevergabe, siehe Nutzerhandbuch: Kreis = 1, Nummern = 2, Zeiger = 2, sofern sie alle korrekt sind).

**Visuell-räumlich**  
[Punkte 0-5]

# VISUELL-RÄUMLICHE FÄHIGKEITEN

➤ Bitten Sie den Probanden, die Punkte zu zählen, ohne auf sie zu zeigen.

Visuell-räumlich

[Punkte 0-4]

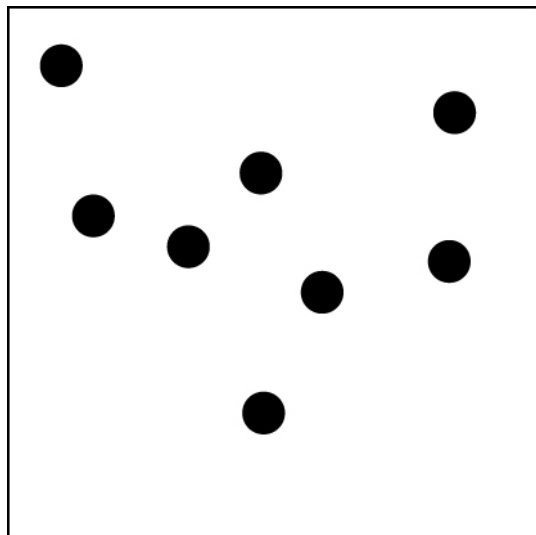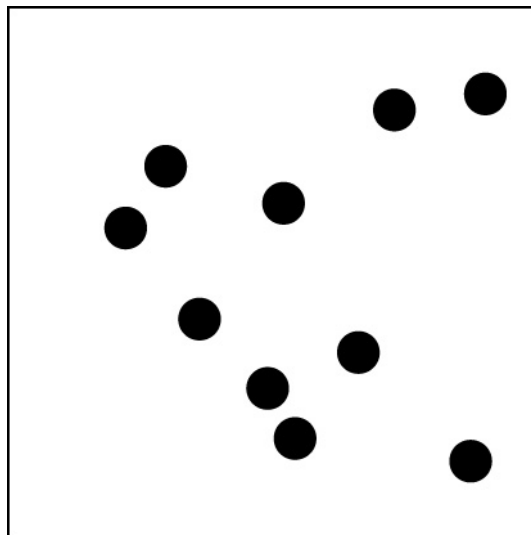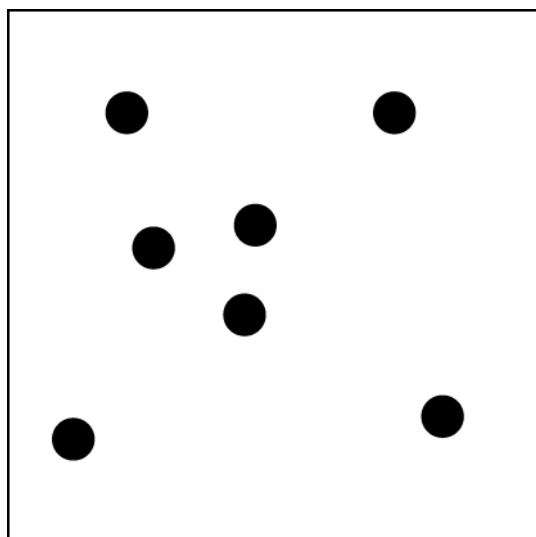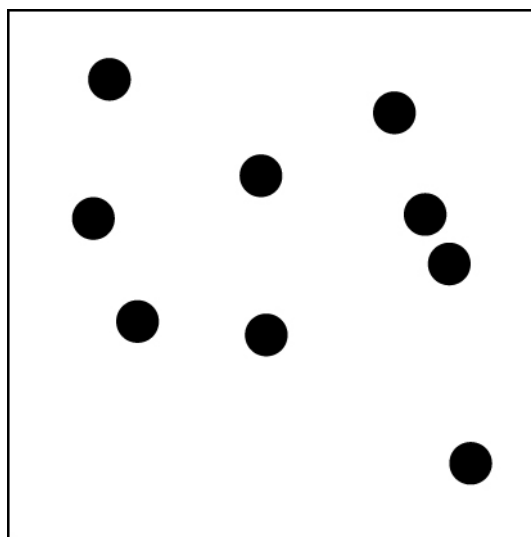

| VISUELL-RÄUMLICHE FÄHIGKEITEN                                                                                                                                                                                                                                                                                                                                                                                                                                                                                                                                                                                                    |  |                                                                                                                                                                                                                                                                                                                                         |  |                                                                                                                                                                              |  |          |  |                                                                                                                                    |  |
|----------------------------------------------------------------------------------------------------------------------------------------------------------------------------------------------------------------------------------------------------------------------------------------------------------------------------------------------------------------------------------------------------------------------------------------------------------------------------------------------------------------------------------------------------------------------------------------------------------------------------------|--|-----------------------------------------------------------------------------------------------------------------------------------------------------------------------------------------------------------------------------------------------------------------------------------------------------------------------------------------|--|------------------------------------------------------------------------------------------------------------------------------------------------------------------------------|--|----------|--|------------------------------------------------------------------------------------------------------------------------------------|--|
| <p>➤ Bitte Sie den Probanden, die folgenden Buchstaben zu identifizieren.</p>                                                                                                                                                                                                                                                                                                                                                                                                                                                                                                                                                    |  |                                                                                                                                                                                                                                                                                                                                         |  |                                                                                                                                                                              |  |          |  | <b>Visuell-räumlich</b><br>[Punkte 0-4]<br><div style="border: 1px solid black; width: 40px; height: 20px; margin: 0 auto;"></div> |  |
| <div style="border: 1px solid black; width: 40px; height: 20px; margin: 0 auto;"></div> 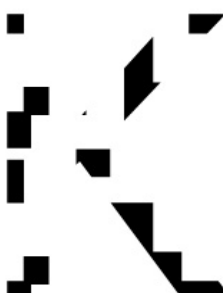                                                                                                                                                                                                                                                                                                                                                                                                                                                        |  |                                                                                                                                                                                                                                                                                                                                         |  | <div style="border: 1px solid black; width: 40px; height: 20px; margin: 0 auto;"></div> 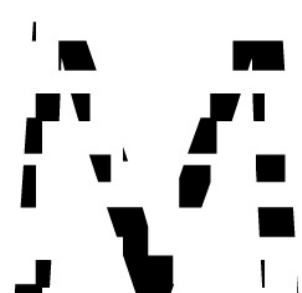   |  |          |  |                                                                                                                                    |  |
| <div style="border: 1px solid black; width: 40px; height: 20px; margin: 0 auto;"></div> 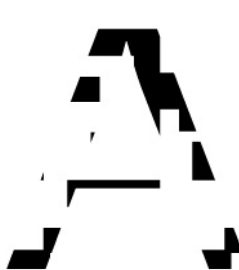                                                                                                                                                                                                                                                                                                                                                                                                                                                       |  |                                                                                                                                                                                                                                                                                                                                         |  | <div style="border: 1px solid black; width: 40px; height: 20px; margin: 0 auto;"></div> 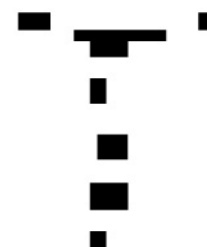 |  |          |  |                                                                                                                                    |  |
| GEDÄCHTNIS                                                                                                                                                                                                                                                                                                                                                                                                                                                                                                                                                                                                                       |  |                                                                                                                                                                                                                                                                                                                                         |  |                                                                                                                                                                              |  |          |  |                                                                                                                                    |  |
| <p>➤ Fragen Sie: „Können Sie mir den Namen und die Adresse nennen, die wir am Anfang wiederholt haben?“</p>                                                                                                                                                                                                                                                                                                                                                                                                                                                                                                                      |  |                                                                                                                                                                                                                                                                                                                                         |  |                                                                                                                                                                              |  |          |  |                                                                                                                                    |  |
| Peter Müller<br>Dorf Strasse 73<br>Wolfsburg<br>Niedersachsen                                                                                                                                                                                                                                                                                                                                                                                                                                                                                                                                                                    |  | <div style="border-bottom: 1px dotted black; height: 15px; margin-bottom: 5px;"></div> <div style="border-bottom: 1px dotted black; height: 15px; margin-bottom: 5px;"></div> <div style="border-bottom: 1px dotted black; height: 15px; margin-bottom: 5px;"></div> <div style="border-bottom: 1px dotted black; height: 15px;"></div> |  |                                                                                                                                                                              |  |          |  | <b>Gedächtnis</b><br>[Punkte 0-7]<br><div style="border: 1px solid black; width: 40px; height: 20px; margin: 0 auto;"></div>       |  |
| GEDÄCHTNIS                                                                                                                                                                                                                                                                                                                                                                                                                                                                                                                                                                                                                       |  |                                                                                                                                                                                                                                                                                                                                         |  |                                                                                                                                                                              |  |          |  |                                                                                                                                    |  |
| <p>➤ Der folgende Test sollte nur durchgeführt werden, wenn eines oder mehrere Items der Anschrift nicht korrekt benannt wurden. Wurden alle Items korrekt benannt, überspringen Sie die Aufgabe und vergeben 5 Punkte. Setzen Sie zunächst einen Haken in der schattierten Spalte rechts, bei jedem Item, an das sich der Proband erinnern konnte und vergeben Sie jeweils 1 Punkt.</p> <p>➤ Gehen Sie anschließend die nicht erinnerten Items durch und sagen sie dem Probanden „Okay, ich gebe Ihnen eine Hilfestellung: war der Name X, Y oder Z?“, usw. Für jedes richtig erkannte Item vergeben Sie ebenfalls 1 Punkt.</p> |  |                                                                                                                                                                                                                                                                                                                                         |  |                                                                                                                                                                              |  |          |  | <b>Gedächtnis</b><br>[Punkte 0-5]<br><div style="border: 1px solid black; width: 40px; height: 20px; margin: 0 auto;"></div>       |  |
| Hans Müller                                                                                                                                                                                                                                                                                                                                                                                                                                                                                                                                                                                                                      |  | Peter Müller                                                                                                                                                                                                                                                                                                                            |  | Peter Schmidt                                                                                                                                                                |  | erinnert |  |                                                                                                                                    |  |
| 37                                                                                                                                                                                                                                                                                                                                                                                                                                                                                                                                                                                                                               |  | 73                                                                                                                                                                                                                                                                                                                                      |  | 76                                                                                                                                                                           |  | erinnert |  |                                                                                                                                    |  |
| Dorf Gasse                                                                                                                                                                                                                                                                                                                                                                                                                                                                                                                                                                                                                       |  | Land Straße                                                                                                                                                                                                                                                                                                                             |  | Dorf Straße                                                                                                                                                                  |  | erinnert |  |                                                                                                                                    |  |
| Kassel                                                                                                                                                                                                                                                                                                                                                                                                                                                                                                                                                                                                                           |  | Wolfsburg                                                                                                                                                                                                                                                                                                                               |  | Braunschweig                                                                                                                                                                 |  | erinnert |  |                                                                                                                                    |  |
| Niedersachsen                                                                                                                                                                                                                                                                                                                                                                                                                                                                                                                                                                                                                    |  | Sachsen-Anhalt                                                                                                                                                                                                                                                                                                                          |  | Baden-Württemberg                                                                                                                                                            |  | erinnert |  |                                                                                                                                    |  |
| GESAMTPUNKTZAHL                                                                                                                                                                                                                                                                                                                                                                                                                                                                                                                                                                                                                  |  |                                                                                                                                                                                                                                                                                                                                         |  |                                                                                                                                                                              |  |          |  |                                                                                                                                    |  |
| <b>ACE-III Gesamtpunktzahl</b>                                                                                                                                                                                                                                                                                                                                                                                                                                                                                                                                                                                                   |  |                                                                                                                                                                                                                                                                                                                                         |  |                                                                                                                                                                              |  | /100     |  |                                                                                                                                    |  |
| <b>Aufmerksamkeit</b>                                                                                                                                                                                                                                                                                                                                                                                                                                                                                                                                                                                                            |  |                                                                                                                                                                                                                                                                                                                                         |  |                                                                                                                                                                              |  | /18      |  |                                                                                                                                    |  |
| <b>Gedächtnis</b>                                                                                                                                                                                                                                                                                                                                                                                                                                                                                                                                                                                                                |  |                                                                                                                                                                                                                                                                                                                                         |  |                                                                                                                                                                              |  | /26      |  |                                                                                                                                    |  |
| <b>Wortflüssigkeit</b>                                                                                                                                                                                                                                                                                                                                                                                                                                                                                                                                                                                                           |  |                                                                                                                                                                                                                                                                                                                                         |  |                                                                                                                                                                              |  | /14      |  |                                                                                                                                    |  |
| <b>Sprache</b>                                                                                                                                                                                                                                                                                                                                                                                                                                                                                                                                                                                                                   |  |                                                                                                                                                                                                                                                                                                                                         |  |                                                                                                                                                                              |  | /26      |  |                                                                                                                                    |  |
| <b>Visuell-räumlich</b>                                                                                                                                                                                                                                                                                                                                                                                                                                                                                                                                                                                                          |  |                                                                                                                                                                                                                                                                                                                                         |  |                                                                                                                                                                              |  | /16      |  |                                                                                                                                    |  |
