# Supplementary material for: Guideline-conform translation and cultural adaptation of the Addenbrooke’s Cognitive Examination III into German
Source: PubMed Central journal article supplement (PMC7174851; doi:10.3205/000280), 2020-04-06
Supplement: GMS-18-04-s-002.pdf [file GMS-18-04-s-002.pdf]

Supplement Table 1. Cultural adaptations

| Category  | Page | Translation decisions                                                                                                                                                      |
|-----------|------|----------------------------------------------------------------------------------------------------------------------------------------------------------------------------|
| Attention | 1    | Suburb - Stadt: We replaced the item "suburb" with "city", as this is common practice in Germany                                                                           |
| Fluency   | 1    | Letters: We replaced prompting for the letter "C" with the letter "K", as this letter is more commonly used for language fluency tests in German.                          |
| Memory    | 2    | Address: We replaced the name and address from the original publication with a name and address involving common names used in Germany.                                    |
| Memory    | 2    | Famous people: We replaced premier of NSW with the German "Bundespräsident", as knowledge of Australian politicians is not usually expected of people residing in Germany. |
| Language  | 2/3  | Repetition: We replaced the original four words with German words of matching length and complexity. This was not possible via direct translation.                         |
| Language  | 3    | Proverbs: The proverbs were replaced by German proverbs matching the length and meaning of the originals.                                                                  |
| Language  | 4    | Reading: We chose words matching the length and readability of the original words with a comparable progression in complexity.                                             |

*List of cultural adaptations that were made during the translation and cultural adaptation process.*
